# Supplementary material
Source: publisher site journal article supplement (https://www.dovepress.com/article/568261)
Supplement: Supplementary file 1 [file 568261%20Supplementary%20Material.docx]

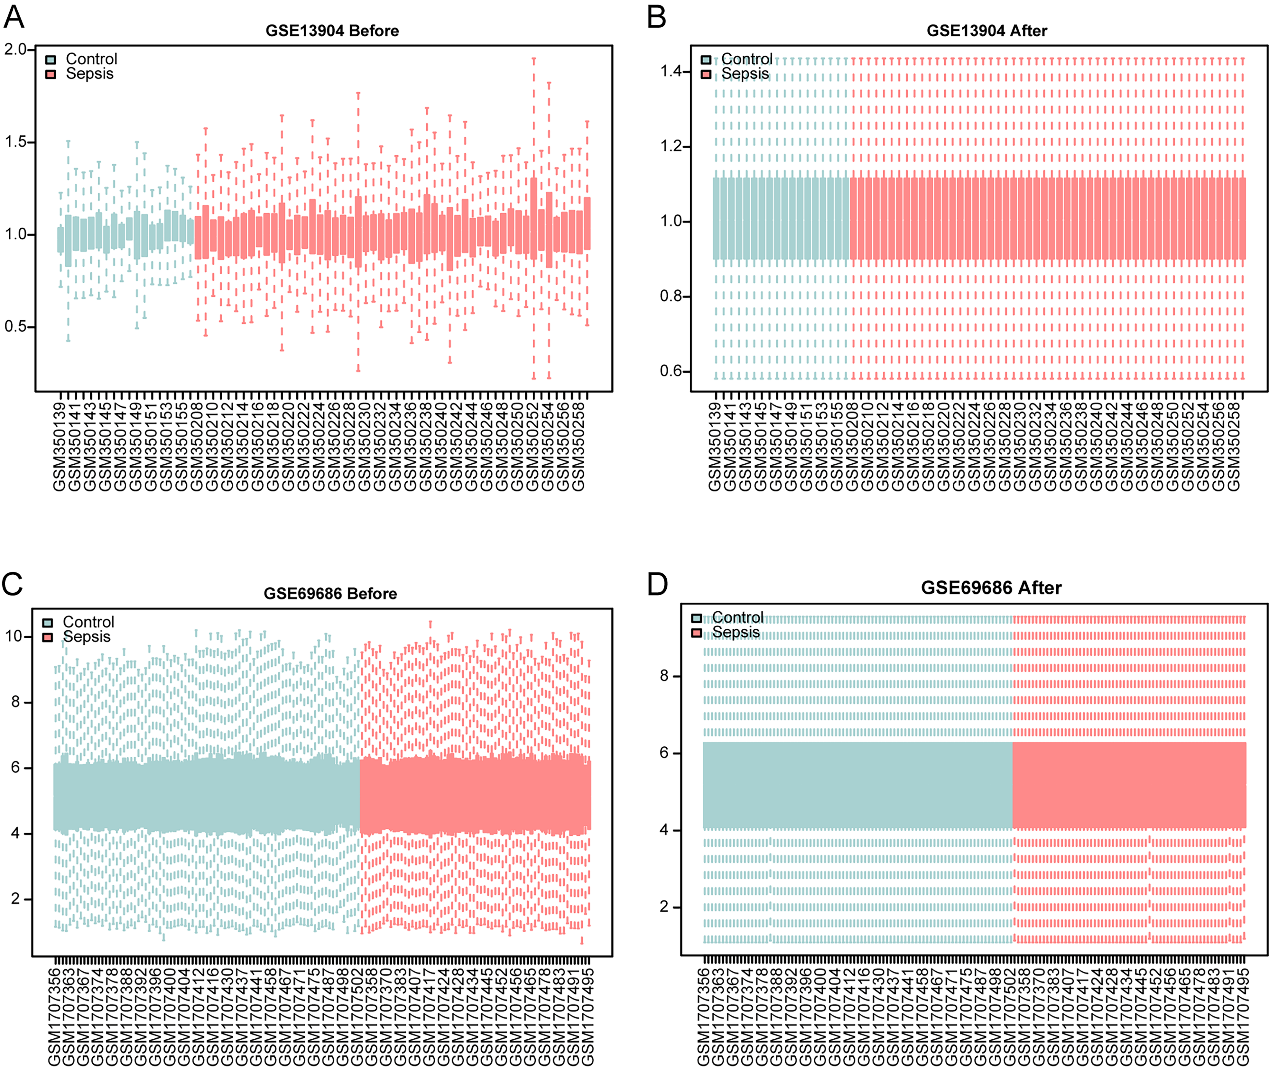


**Supplementary Figure 1:** **Preprocessing and normalization of individual GEO datasets**

A-B.The boxplot of the GSE13904 dataset before (A) and after (B) batch effect removal. C-D. The boxplot of the GSE69686 dataset before (C) and after (D) batch effect removal. Samples were stratified by clinical status, with green boxes representing control subjects and red boxes indicating sepsis patients.

**
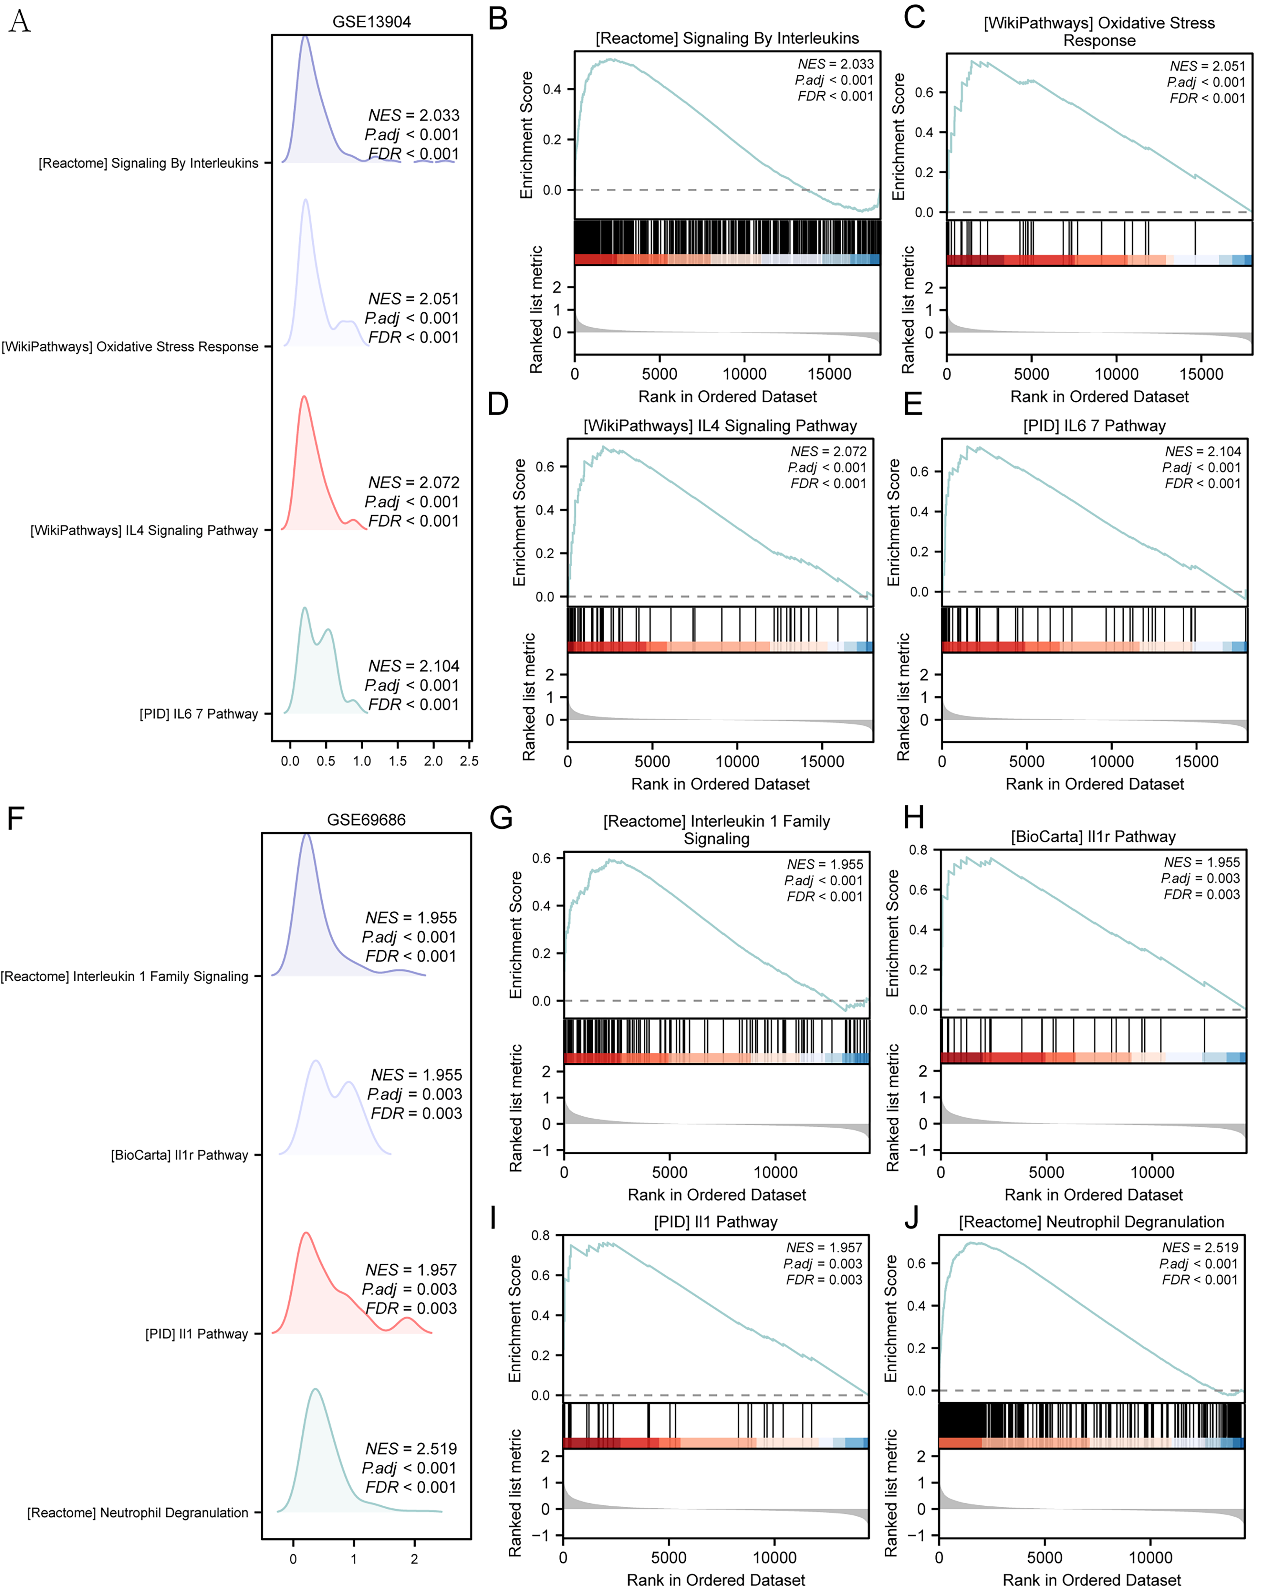
**

**Supplementary Figure 2:GSEA**

A-E. The visualizations of GSEA in GSE13904. F-J. The visualizations of GSEA in GSE69686. (The screening criteria of GSEA enrichment items were P.adj < 0.05 and FDR value (q-value) < 0.05.)


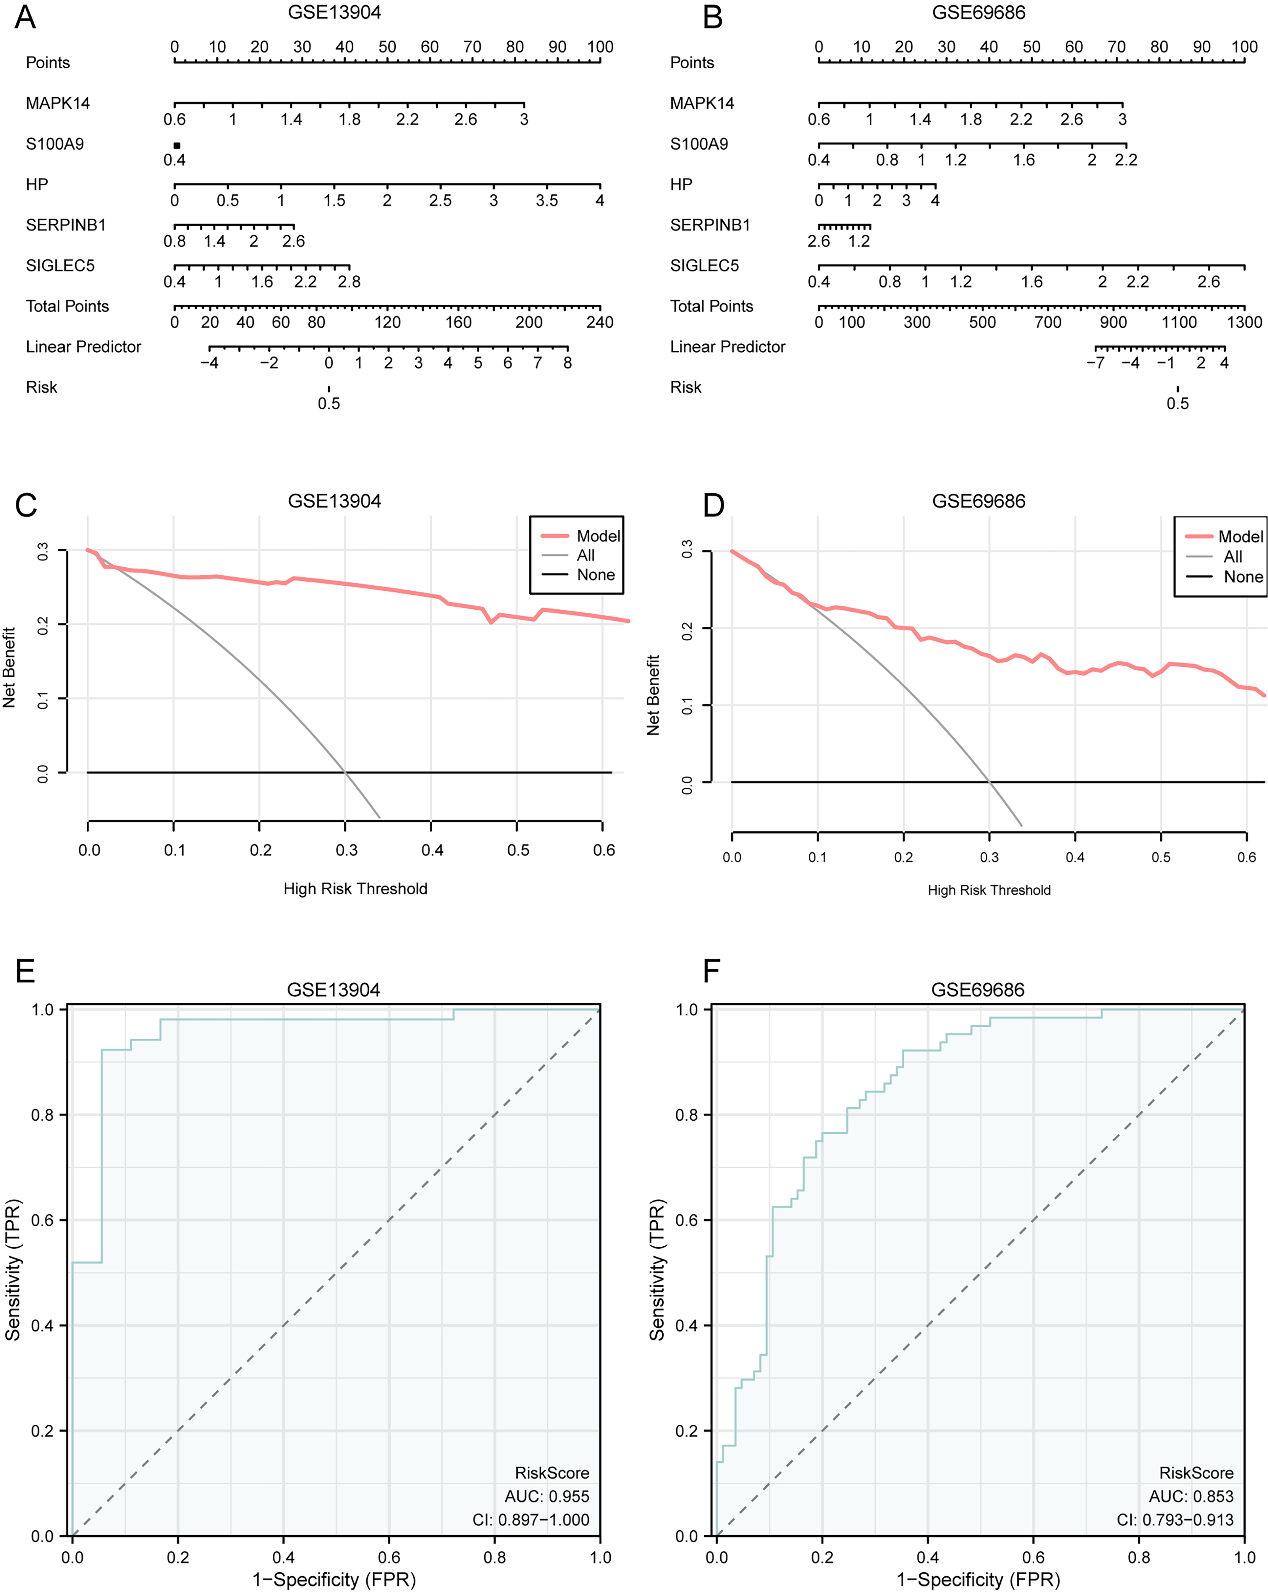


**Supplementary Figure 3:Diagnostic performance of key genes and validation of LASSO risk model**

A.The nomogram of the key genes generated from the diagnostic model of pediatric sepsis in GSE13904. B. The nomogram of the key genes generated from the diagnosis model of pediatric sepsis in GSE69686. C.The DCA plot based on the pediatric sepsis diagnostic model in GSE13904. D. The DCA plot based on the pediatric sepsis diagnostic model in GSE69686. E.The ROC curve of LASSO RiskScore in GSE13904. F.The ROC curve of LASSO RiskScore in GSE69686. (The ordinate of the DCA plot was the Net Benefit, and the abscissa was Threshold Probability.)

**
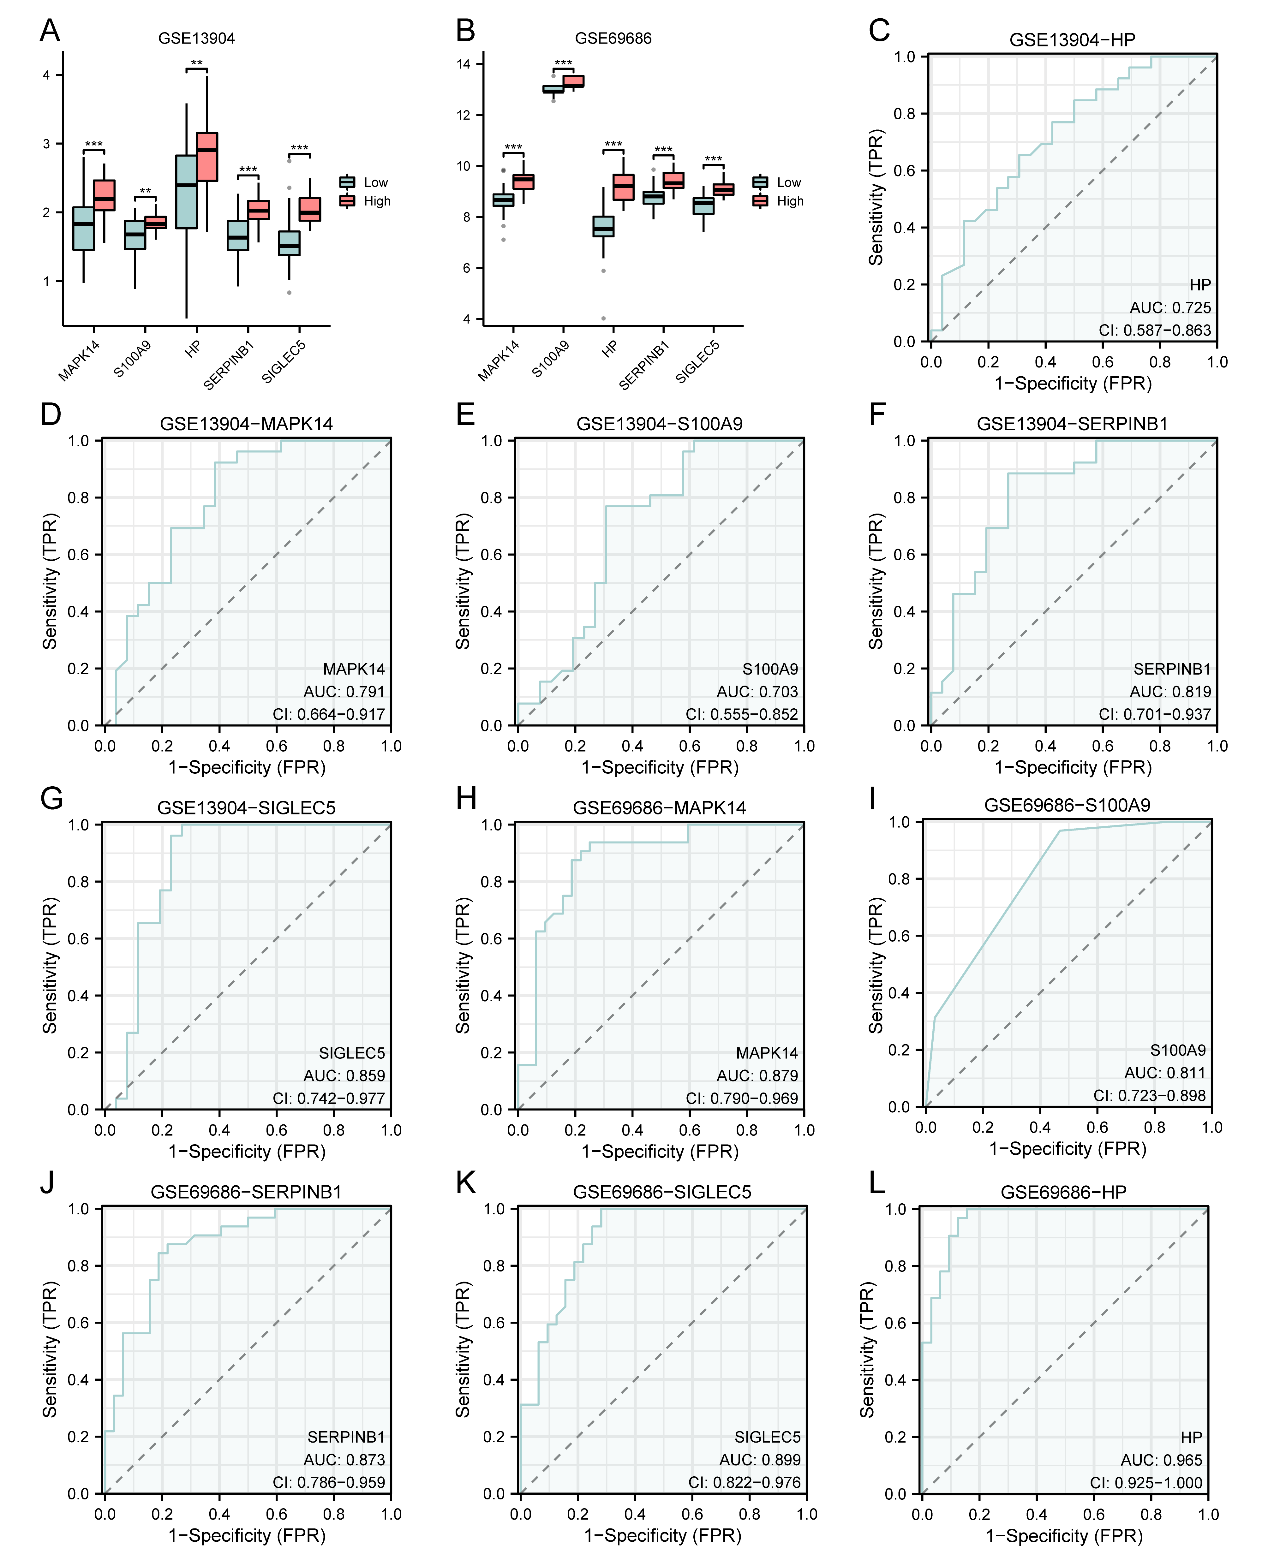
**

**Supplementary Figure 4:IMS construction and correlation analysis of key genes**

A.The group comparison plot of key genes between Low-score and High-score Groups in GSE13904. B. The group comparison plot of key genes between Low-score and High-score Groups in GSE69686. C-G. The ROC curves of key genes HP (C), MAPK14 (D), S100A9 (E), SERPINB1 (F), SIGLEC5 (G) in Low-score and High-score Groups in Sepsis Cohort of GSE13904. H-L.The ROC curves of key genes MAPK14 (H), S100A9 (I), SERPINB1 (J), SIGLEC5 (K), HP (L) in Low-score and High-score Groups in Sepsis Cohort of GSE69686. (The symbol ** is equivalent to *p* < 0.01, which is highly statistically significant. The symbol *** is equivalent to *p* < 0.001 and highly statistically significant.)

**Supplementary Table 1:Immunomodulatory-related genes list**

| Gene Symbol | Category | Uniprot ID | Gifts | GC Id | Relevance score | GeneCards Link |
| --- | --- | --- | --- | --- | --- | --- |
| PIBF1 | Protein Coding | Q8WXW3 | 48 | GC13P072782 | 18.99830055 | https://www.genecards.org/cgi-bin/carddisp.pl?gene=PIBF1 |
| TNF | Protein Coding | P01375 | 58 | GC06P104098 | 8.309593201 | https://www.genecards.org/cgi-bin/carddisp.pl?gene=TNF |
| IFNG | Protein Coding | P01579 | 57 | GC12M068154 | 7.02702713 | https://www.genecards.org/cgi-bin/carddisp.pl?gene=IFNG |
| IL10 | Protein Coding | P22301 | 54 | GC01M206767 | 6.427990437 | https://www.genecards.org/cgi-bin/carddisp.pl?gene=IL10 |
| IFNA1 | Protein Coding | P01562 | 46 | GC09P021647 | 5.894622803 | https://www.genecards.org/cgi-bin/carddisp.pl?gene=IFNA1 |
| IL2 | Protein Coding | P60568 | 52 | GC04M122451 | 5.590465546 | https://www.genecards.org/cgi-bin/carddisp.pl?gene=IL2 |
| IL6 | Protein Coding | P05231 | 58 | GC07P022725 | 5.29732132 | https://www.genecards.org/cgi-bin/carddisp.pl?gene=IL6 |
| ITFG1 | Protein Coding | Q8TB96 | 44 | GC16M047158 | 4.726233482 | https://www.genecards.org/cgi-bin/carddisp.pl?gene=ITFG1 |
| IL1B | Protein Coding | P01584 | 54 | GC02M112829 | 4.500985146 | https://www.genecards.org/cgi-bin/carddisp.pl?gene=IL1B |
| IFNA2 | Protein Coding | P01563 | 50 | GC09M021384 | 4.456249237 | https://www.genecards.org/cgi-bin/carddisp.pl?gene=IFNA2 |
| CRBN | Protein Coding | Q96SW2 | 50 | GC03M003144 | 4.35139513 | https://www.genecards.org/cgi-bin/carddisp.pl?gene=CRBN |
| CXCL8 | Protein Coding | P10145 | 50 | GC04P073740 | 3.994592428 | https://www.genecards.org/cgi-bin/carddisp.pl?gene=CXCL8 |
| IFNB1 | Protein Coding | P01574 | 49 | GC09M021077 | 3.667127848 | https://www.genecards.org/cgi-bin/carddisp.pl?gene=IFNB1 |
| IFNL3 | Protein Coding | Q8IZI9 | 42 | GC19M039243 | 3.657220364 | https://www.genecards.org/cgi-bin/carddisp.pl?gene=IFNL3 |
| IL2RA | Protein Coding | P01589 | 57 | GC10M006010 | 3.512711763 | https://www.genecards.org/cgi-bin/carddisp.pl?gene=IL2RA |
| IFNL1 | Protein Coding | Q8IU54 | 42 | GC19P039296 | 3.48226738 | https://www.genecards.org/cgi-bin/carddisp.pl?gene=IFNL1 |
| IL4 | Protein Coding | P05112 | 53 | GC05P132673 | 3.430182457 | https://www.genecards.org/cgi-bin/carddisp.pl?gene=IL4 |
| IFNL2 | Protein Coding | Q8IZJ0 | 41 | GC19P039268 | 3.35384202 | https://www.genecards.org/cgi-bin/carddisp.pl?gene=IFNL2 |
| IL5 | Protein Coding | P05113 | 52 | GC05M132541 | 3.350766182 | https://www.genecards.org/cgi-bin/carddisp.pl?gene=IL5 |
| CSF2 | Protein Coding | P04141 | 52 | GC05P132073 | 3.201389074 | https://www.genecards.org/cgi-bin/carddisp.pl?gene=CSF2 |
| IL16 | Protein Coding | Q14005 | 47 | GC15P081159 | 3.148973227 | https://www.genecards.org/cgi-bin/carddisp.pl?gene=IL16 |
| IL2RB | Protein Coding | P14784 | 57 | GC22M068173 | 3.10970068 | https://www.genecards.org/cgi-bin/carddisp.pl?gene=IL2RB |
| CST9 | Protein Coding | Q5W186 | 38 | GC20M023780 | 2.833693266 | https://www.genecards.org/cgi-bin/carddisp.pl?gene=CST9 |
| TLR4 | Protein Coding | O00206 | 58 | GC09P117704 | 2.804186344 | https://www.genecards.org/cgi-bin/carddisp.pl?gene=TLR4 |
| IDO1 | Protein Coding | P14902 | 53 | GC08P039891 | 2.74025774 | https://www.genecards.org/cgi-bin/carddisp.pl?gene=IDO1 |
| ICAM1 | Protein Coding | P05362 | 57 | GC19P011104 | 2.693132401 | https://www.genecards.org/cgi-bin/carddisp.pl?gene=ICAM1 |
| IL1A | Protein Coding | P01583 | 52 | GC02M112773 | 2.610424757 | https://www.genecards.org/cgi-bin/carddisp.pl?gene=IL1A |
| IL13 | Protein Coding | P35225 | 49 | GC05P132656 | 2.607948542 | https://www.genecards.org/cgi-bin/carddisp.pl?gene=IL13 |
| IL18 | Protein Coding | Q14116 | 50 | GC11M112143 | 2.587725401 | https://www.genecards.org/cgi-bin/carddisp.pl?gene=IL18 |
| VEGFA | Protein Coding | P15692 | 56 | GC06P043770 | 2.577245235 | https://www.genecards.org/cgi-bin/carddisp.pl?gene=VEGFA |
| ITGB2 | Protein Coding | P05107 | 57 | GC21M044885 | 2.495863676 | https://www.genecards.org/cgi-bin/carddisp.pl?gene=ITGB2 |
| HLA-G | Protein Coding | P17693 | 50 | GC06P104048 | 2.441944122 | https://www.genecards.org/cgi-bin/carddisp.pl?gene=HLA-G |
| TGFB1 | Protein Coding | P01137 | 60 | GC19M041301 | 2.433300495 | https://www.genecards.org/cgi-bin/carddisp.pl?gene=TGFB1 |
| LGALS1 | Protein Coding | P09382 | 49 | GC22P037675 | 2.43209362 | https://www.genecards.org/cgi-bin/carddisp.pl?gene=LGALS1 |
| IL1RN | Protein Coding | P18510 | 57 | GC02P125995 | 2.39667511 | https://www.genecards.org/cgi-bin/carddisp.pl?gene=IL1RN |
| CD4 | Protein Coding | P01730 | 56 | GC12P006786 | 2.379223585 | https://www.genecards.org/cgi-bin/carddisp.pl?gene=CD4 |
| CRP | Protein Coding | P02741 | 52 | GC01M159732 | 2.347884178 | https://www.genecards.org/cgi-bin/carddisp.pl?gene=CRP |
| CAMP | Protein Coding | P49913 | 46 | GC03P051545 | 2.321359634 | https://www.genecards.org/cgi-bin/carddisp.pl?gene=CAMP |
| CCL5 | Protein Coding | P13501 | 50 | GC17M035871 | 2.316824913 | https://www.genecards.org/cgi-bin/carddisp.pl?gene=CCL5 |
| LTA | Protein Coding | P01374 | 49 | GC06P104096 | 2.316824913 | https://www.genecards.org/cgi-bin/carddisp.pl?gene=LTA |
| IL1RAPL2 | Protein Coding | Q9NP60 | 46 | GC0XP104566 | 2.285741329 | https://www.genecards.org/cgi-bin/carddisp.pl?gene=IL1RAPL2 |
| PTGS2 | Protein Coding | P35354 | 56 | GC01M186671 | 2.278892279 | https://www.genecards.org/cgi-bin/carddisp.pl?gene=PTGS2 |
| PAEP | Protein Coding | P09466 | 46 | GC09P135561 | 2.241987228 | https://www.genecards.org/cgi-bin/carddisp.pl?gene=PAEP |
| MOG | Protein Coding | Q16653 | 52 | GC06P104040 | 2.184787989 | https://www.genecards.org/cgi-bin/carddisp.pl?gene=MOG |
| CCL2 | Protein Coding | P13500 | 55 | GC17P034255 | 2.154789686 | https://www.genecards.org/cgi-bin/carddisp.pl?gene=CCL2 |
| IKZF1 | Protein Coding | Q13422 | 56 | GC07P050303 | 2.146098375 | https://www.genecards.org/cgi-bin/carddisp.pl?gene=IKZF1 |
| IL17A | Protein Coding | Q16552 | 49 | GC06P052186 | 2.143940449 | https://www.genecards.org/cgi-bin/carddisp.pl?gene=IL17A |
| IL15 | Protein Coding | P40933 | 49 | GC04P141636 | 2.137278318 | https://www.genecards.org/cgi-bin/carddisp.pl?gene=IL15 |
| TLR2 | Protein Coding | O60603 | 58 | GC04P153684 | 2.116314411 | https://www.genecards.org/cgi-bin/carddisp.pl?gene=TLR2 |
| EPO | Protein Coding | P01588 | 49 | GC07P100720 | 2.082601547 | https://www.genecards.org/cgi-bin/carddisp.pl?gene=EPO |
| LBR | Protein Coding | Q14739 | 53 | GC01M225401 | 2.072636127 | https://www.genecards.org/cgi-bin/carddisp.pl?gene=LBR |
| CTLA4 | Protein Coding | P16410 | 54 | GC02P203854 | 2.015553713 | https://www.genecards.org/cgi-bin/carddisp.pl?gene=CTLA4 |
| SEMA7A | Protein Coding | O75326 | 50 | GC15M074409 | 2.000174761 | https://www.genecards.org/cgi-bin/carddisp.pl?gene=SEMA7A |
| CSF3 | Protein Coding | P09919 | 47 | GC17P040015 | 1.999569893 | https://www.genecards.org/cgi-bin/carddisp.pl?gene=CSF3 |
| CD274 | Protein Coding | Q9NZQ7 | 52 | GC09P005450 | 1.995124817 | https://www.genecards.org/cgi-bin/carddisp.pl?gene=CD274 |
| MIF | Protein Coding | P14174 | 54 | GC22P023894 | 1.991367459 | https://www.genecards.org/cgi-bin/carddisp.pl?gene=MIF |
| STAT1 | Protein Coding | P42224 | 60 | GC02M190908 | 1.95857954 | https://www.genecards.org/cgi-bin/carddisp.pl?gene=STAT1 |
| CD40LG | Protein Coding | P29965 | 57 | GC0XP136649 | 1.921501279 | https://www.genecards.org/cgi-bin/carddisp.pl?gene=CD40LG |
| BMP6 | Protein Coding | P22004 | 52 | GC06P007726 | 1.921501279 | https://www.genecards.org/cgi-bin/carddisp.pl?gene=BMP6 |
| TLR9 | Protein Coding | Q9NR96 | 52 | GC03M052595 | 1.916862369 | https://www.genecards.org/cgi-bin/carddisp.pl?gene=TLR9 |
| CCL4 | Protein Coding | P13236 | 46 | GC17P036103 | 1.910817742 | https://www.genecards.org/cgi-bin/carddisp.pl?gene=CCL4 |
| HGF | Protein Coding | P14210 | 58 | GC07M081699 | 1.908559322 | https://www.genecards.org/cgi-bin/carddisp.pl?gene=HGF |
| IL1R1 | Protein Coding | P14778 | 53 | GC02P102136 | 1.895289421 | https://www.genecards.org/cgi-bin/carddisp.pl?gene=IL1R1 |
| HMOX1 | Protein Coding | P09601 | 59 | GC22P035380 | 1.8733145 | https://www.genecards.org/cgi-bin/carddisp.pl?gene=HMOX1 |
| SLURP1 | Protein Coding | P55000 | 46 | GC08M142740 | 1.870983839 | https://www.genecards.org/cgi-bin/carddisp.pl?gene=SLURP1 |
| PDE4A | Protein Coding | P27815 | 51 | GC19P010416 | 1.867657661 | https://www.genecards.org/cgi-bin/carddisp.pl?gene=PDE4A |
| VDR | Protein Coding | P11473 | 57 | GC12M047841 | 1.867486238 | https://www.genecards.org/cgi-bin/carddisp.pl?gene=VDR |
| IL12B | Protein Coding | P29460 | 52 | GC05M159314 | 1.849833965 | https://www.genecards.org/cgi-bin/carddisp.pl?gene=IL12B |
| B2M | Protein Coding | P61769 | 56 | GC15P044711 | 1.847458601 | https://www.genecards.org/cgi-bin/carddisp.pl?gene=B2M |
| S100A7 | Protein Coding | P31151 | 46 | GC01M153457 | 1.832571745 | https://www.genecards.org/cgi-bin/carddisp.pl?gene=S100A7 |
| IL1F10 | Protein Coding | Q8WWZ1 | 44 | GC02P113067 | 1.822443604 | https://www.genecards.org/cgi-bin/carddisp.pl?gene=IL1F10 |
| NOS2 | Protein Coding | P35228 | 56 | GC17M027756 | 1.814049006 | https://www.genecards.org/cgi-bin/carddisp.pl?gene=NOS2 |
| HLA-DRB1 | Protein Coding | P01911 | 54 | GC06M080969 | 1.807007313 | https://www.genecards.org/cgi-bin/carddisp.pl?gene=HLA-DRB1 |
| CXCR4 | Protein Coding | P61073 | 59 | GC02M136114 | 1.773149133 | https://www.genecards.org/cgi-bin/carddisp.pl?gene=CXCR4 |
| CSF1 | Protein Coding | P09603 | 51 | GC01P109911 | 1.773149133 | https://www.genecards.org/cgi-bin/carddisp.pl?gene=CSF1 |
| JUN | Protein Coding | P05412 | 56 | GC01M058780 | 1.747568011 | https://www.genecards.org/cgi-bin/carddisp.pl?gene=JUN |
| STAT3 | Protein Coding | P40763 | 61 | GC17M042313 | 1.742712736 | https://www.genecards.org/cgi-bin/carddisp.pl?gene=STAT3 |
| TLR7 | Protein Coding | Q9NYK1 | 54 | GC0XP012867 | 1.714423776 | https://www.genecards.org/cgi-bin/carddisp.pl?gene=TLR7 |
| PLA2G3 | Protein Coding | Q9NZ20 | 46 | GC22M068024 | 1.705257297 | https://www.genecards.org/cgi-bin/carddisp.pl?gene=PLA2G3 |
| CLEC4E | Protein Coding | Q9ULY5 | 42 | GC12M008554 | 1.705257297 | https://www.genecards.org/cgi-bin/carddisp.pl?gene=CLEC4E |
| TMPO | Protein Coding | P42166 | 53 | GC12P098515 | 1.686917782 | https://www.genecards.org/cgi-bin/carddisp.pl?gene=TMPO |
| IL3 | Protein Coding | P08700 | 52 | GC05P132060 | 1.686917782 | https://www.genecards.org/cgi-bin/carddisp.pl?gene=IL3 |
| TNFRSF1A | Protein Coding | P19438 | 57 | GC12M006328 | 1.657213688 | https://www.genecards.org/cgi-bin/carddisp.pl?gene=TNFRSF1A |
| FASLG | Protein Coding | P48023 | 55 | GC01P172659 | 1.657213688 | https://www.genecards.org/cgi-bin/carddisp.pl?gene=FASLG |
| CD40 | Protein Coding | P25942 | 57 | GC20P046118 | 1.65700531 | https://www.genecards.org/cgi-bin/carddisp.pl?gene=CD40 |
| CD80 | Protein Coding | P33681 | 50 | GC03M119524 | 1.644652128 | https://www.genecards.org/cgi-bin/carddisp.pl?gene=CD80 |
| CD8A | Protein Coding | P01732 | 54 | GC02M086784 | 1.63791275 | https://www.genecards.org/cgi-bin/carddisp.pl?gene=CD8A |
| LY9 | Protein Coding | Q9HBG7 | 46 | GC01P160796 | 1.629598975 | https://www.genecards.org/cgi-bin/carddisp.pl?gene=LY9 |
| TLR3 | Protein Coding | O15455 | 58 | GC04P186059 | 1.619800448 | https://www.genecards.org/cgi-bin/carddisp.pl?gene=TLR3 |
| PPARG | Protein Coding | P37231 | 60 | GC03P012287 | 1.605802774 | https://www.genecards.org/cgi-bin/carddisp.pl?gene=PPARG |
| MAPK1 | Protein Coding | P28482 | 60 | GC22M021759 | 1.592178941 | https://www.genecards.org/cgi-bin/carddisp.pl?gene=MAPK1 |
| MBP | Protein Coding | P02686 | 51 | GC18M076978 | 1.592178941 | https://www.genecards.org/cgi-bin/carddisp.pl?gene=MBP |
| BIRC5 | Protein Coding | O15392 | 52 | GC17P078214 | 1.587458611 | https://www.genecards.org/cgi-bin/carddisp.pl?gene=BIRC5 |
| HMGCR | Protein Coding | P04035 | 53 | GC05P075336 | 1.578171015 | https://www.genecards.org/cgi-bin/carddisp.pl?gene=HMGCR |
| CNR2 | Protein Coding | P34972 | 52 | GC01M023870 | 1.578171015 | https://www.genecards.org/cgi-bin/carddisp.pl?gene=CNR2 |
| LGALS3 | Protein Coding | P17931 | 52 | GC14P055124 | 1.563744783 | https://www.genecards.org/cgi-bin/carddisp.pl?gene=LGALS3 |
| CD86 | Protein Coding | P42081 | 51 | GC03P122055 | 1.563744783 | https://www.genecards.org/cgi-bin/carddisp.pl?gene=CD86 |
| DDB1 | Protein Coding | Q16531 | 53 | GC11M109043 | 1.561092019 | https://www.genecards.org/cgi-bin/carddisp.pl?gene=DDB1 |
| BIRC3 | Protein Coding | Q13489 | 53 | GC11P102317 | 1.550212383 | https://www.genecards.org/cgi-bin/carddisp.pl?gene=BIRC3 |
| ITGA4 | Protein Coding | P13612 | 55 | GC02P181456 | 1.545142293 | https://www.genecards.org/cgi-bin/carddisp.pl?gene=ITGA4 |
| LTF | Protein Coding | P02788 | 52 | GC03M046435 | 1.535919428 | https://www.genecards.org/cgi-bin/carddisp.pl?gene=LTF |
| DHODH | Protein Coding | Q02127 | 52 | GC16P072008 | 1.533470511 | https://www.genecards.org/cgi-bin/carddisp.pl?gene=DHODH |
| CD200 | Protein Coding | P41217 | 47 | GC03P112332 | 1.533470511 | https://www.genecards.org/cgi-bin/carddisp.pl?gene=CD200 |
| TNFRSF11B | Protein Coding | O00300 | 54 | GC08M118923 | 1.528733253 | https://www.genecards.org/cgi-bin/carddisp.pl?gene=TNFRSF11B |
| CXCR3 | Protein Coding | P49682 | 50 | GC0XM071615 | 1.528566241 | https://www.genecards.org/cgi-bin/carddisp.pl?gene=CXCR3 |
| CASP3 | Protein Coding | P42574 | 56 | GC04M184627 | 1.500944734 | https://www.genecards.org/cgi-bin/carddisp.pl?gene=CASP3 |
| IKZF3 | Protein Coding | Q9UKT9 | 49 | GC17M060752 | 1.498769045 | https://www.genecards.org/cgi-bin/carddisp.pl?gene=IKZF3 |
| CUL4A | Protein Coding | Q13619 | 50 | GC13P113208 | 1.493196607 | https://www.genecards.org/cgi-bin/carddisp.pl?gene=CUL4A |
| TNFSF11 | Protein Coding | O14788 | 56 | GC13P042562 | 1.474179864 | https://www.genecards.org/cgi-bin/carddisp.pl?gene=TNFSF11 |
| HLA-B | Protein Coding | P01889 | 53 | GC06M080881 | 1.474179864 | https://www.genecards.org/cgi-bin/carddisp.pl?gene=HLA-B |
| CXCL10 | Protein Coding | P02778 | 51 | GC04M076021 | 1.468156815 | https://www.genecards.org/cgi-bin/carddisp.pl?gene=CXCL10 |
| IL7 | Protein Coding | P13232 | 50 | GC08M078689 | 1.468156815 | https://www.genecards.org/cgi-bin/carddisp.pl?gene=IL7 |
| LGALS9 | Protein Coding | O00182 | 46 | GC17P027629 | 1.468156815 | https://www.genecards.org/cgi-bin/carddisp.pl?gene=LGALS9 |
| MAPK3 | Protein Coding | P27361 | 56 | GC16M040839 | 1.465575099 | https://www.genecards.org/cgi-bin/carddisp.pl?gene=MAPK3 |
| ISG15 | Protein Coding | P05161 | 53 | GC01P001001 | 1.465575099 | https://www.genecards.org/cgi-bin/carddisp.pl?gene=ISG15 |
| CD276 | Protein Coding | Q5ZPR3 | 48 | GC15P073683 | 1.465575099 | https://www.genecards.org/cgi-bin/carddisp.pl?gene=CD276 |
| JAK2 | Protein Coding | O60674 | 60 | GC09P004985 | 1.454073906 | https://www.genecards.org/cgi-bin/carddisp.pl?gene=JAK2 |
| PDCD1 | Protein Coding | Q15116 | 54 | GC02M241849 | 1.443716049 | https://www.genecards.org/cgi-bin/carddisp.pl?gene=PDCD1 |
| TNFSF10 | Protein Coding | P50591 | 51 | GC03M172505 | 1.432666779 | https://www.genecards.org/cgi-bin/carddisp.pl?gene=TNFSF10 |
| CNR1 | Protein Coding | P21554 | 53 | GC06M088139 | 1.426452398 | https://www.genecards.org/cgi-bin/carddisp.pl?gene=CNR1 |
| CCL3 | Protein Coding | P10147 | 46 | GC17M036088 | 1.418136597 | https://www.genecards.org/cgi-bin/carddisp.pl?gene=CCL3 |
| TLR8 | Protein Coding | Q9NR97 | 55 | GC0XP012924 | 1.409667611 | https://www.genecards.org/cgi-bin/carddisp.pl?gene=TLR8 |
| ADIPOQ | Protein Coding | Q15848 | 52 | GC03P186842 | 1.409667611 | https://www.genecards.org/cgi-bin/carddisp.pl?gene=ADIPOQ |
| ADORA2A | Protein Coding | P29274 | 53 | GC22P024417 | 1.405045271 | https://www.genecards.org/cgi-bin/carddisp.pl?gene=ADORA2A |
| KLK3 | Protein Coding | P07288 | 53 | GC19P050854 | 1.384657502 | https://www.genecards.org/cgi-bin/carddisp.pl?gene=KLK3 |
| XIAP | Protein Coding | P98170 | 58 | GC0XP123859 | 1.38448596 | https://www.genecards.org/cgi-bin/carddisp.pl?gene=XIAP |
| BIRC2 | Protein Coding | Q13490 | 54 | GC11P102347 | 1.38448596 | https://www.genecards.org/cgi-bin/carddisp.pl?gene=BIRC2 |
| TP53 | Protein Coding | P04637 | 60 | GC17M007661 | 1.362808704 | https://www.genecards.org/cgi-bin/carddisp.pl?gene=TP53 |
| FAS | Protein Coding | P25445 | 57 | GC10P098532 | 1.332534432 | https://www.genecards.org/cgi-bin/carddisp.pl?gene=FAS |
| CD69 | Protein Coding | Q07108 | 49 | GC12M024897 | 1.332534432 | https://www.genecards.org/cgi-bin/carddisp.pl?gene=CD69 |
| ADAM17 | Protein Coding | P78536 | 57 | GC02M009488 | 1.325593591 | https://www.genecards.org/cgi-bin/carddisp.pl?gene=ADAM17 |
| IL6R | Protein Coding | P08887 | 57 | GC01P154405 | 1.325593591 | https://www.genecards.org/cgi-bin/carddisp.pl?gene=IL6R |
| MADCAM1 | Protein Coding | Q13477 | 47 | GC19P005539 | 1.325593591 | https://www.genecards.org/cgi-bin/carddisp.pl?gene=MADCAM1 |
| INS | Protein Coding | P01308 | 54 | GC11M002159 | 1.300008655 | https://www.genecards.org/cgi-bin/carddisp.pl?gene=INS |
| IL17RB | Protein Coding | Q9NRM6 | 48 | GC03P053855 | 1.297972083 | https://www.genecards.org/cgi-bin/carddisp.pl?gene=IL17RB |
| LST1 | Protein Coding | O00453 | 42 | GC06P104099 | 1.297972083 | https://www.genecards.org/cgi-bin/carddisp.pl?gene=LST1 |
| AQP4 | Protein Coding | P55087 | 53 | GC18M026852 | 1.293164492 | https://www.genecards.org/cgi-bin/carddisp.pl?gene=AQP4 |
| CD55 | Protein Coding | P08174 | 56 | GC01P207321 | 1.288347363 | https://www.genecards.org/cgi-bin/carddisp.pl?gene=CD55 |
| BCL2L1 | Protein Coding | Q07817 | 54 | GC20M031664 | 1.288347363 | https://www.genecards.org/cgi-bin/carddisp.pl?gene=BCL2L1 |
| C1QA | Protein Coding | P02745 | 53 | GC01P022937 | 1.288347363 | https://www.genecards.org/cgi-bin/carddisp.pl?gene=C1QA |
| FOXP3 | Protein Coding | Q9BZS1 | 54 | GC0XM049250 | 1.282726407 | https://www.genecards.org/cgi-bin/carddisp.pl?gene=FOXP3 |
| HRH4 | Protein Coding | Q9H3N8 | 51 | GC18P024460 | 1.282726407 | https://www.genecards.org/cgi-bin/carddisp.pl?gene=HRH4 |
| GAA | Protein Coding | P10253 | 56 | GC17P080101 | 1.26463902 | https://www.genecards.org/cgi-bin/carddisp.pl?gene=GAA |
| CYCS | Protein Coding | P99999 | 55 | GC07M025118 | 1.26463902 | https://www.genecards.org/cgi-bin/carddisp.pl?gene=CYCS |
| SCGB1A1 | Protein Coding | P11684 | 48 | GC11P062405 | 1.25229001 | https://www.genecards.org/cgi-bin/carddisp.pl?gene=SCGB1A1 |
| DPEP1 | Protein Coding | P16444 | 50 | GC16P089613 | 1.245622277 | https://www.genecards.org/cgi-bin/carddisp.pl?gene=DPEP1 |
| IRF4 | Protein Coding | Q15306 | 50 | GC06P000391 | 1.245622277 | https://www.genecards.org/cgi-bin/carddisp.pl?gene=IRF4 |
| IL23A | Protein Coding | Q9NPF7 | 45 | GC12P058135 | 1.245622277 | https://www.genecards.org/cgi-bin/carddisp.pl?gene=IL23A |
| CDK6 | Protein Coding | Q00534 | 58 | GC07M092604 | 1.239807129 | https://www.genecards.org/cgi-bin/carddisp.pl?gene=CDK6 |
| COMP | Protein Coding | P49747 | 53 | GC19M018783 | 1.239807129 | https://www.genecards.org/cgi-bin/carddisp.pl?gene=COMP |
| IL11 | Protein Coding | P20809 | 47 | GC19M055364 | 1.217635751 | https://www.genecards.org/cgi-bin/carddisp.pl?gene=IL11 |
| MYC | Protein Coding | P01106 | 59 | GC08P127735 | 1.204109192 | https://www.genecards.org/cgi-bin/carddisp.pl?gene=MYC |
| ENG | Protein Coding | P17813 | 55 | GC09M127815 | 1.204109192 | https://www.genecards.org/cgi-bin/carddisp.pl?gene=ENG |
| HLA-DQB1 | Protein Coding | P01920 | 49 | GC06M080978 | 1.204109192 | https://www.genecards.org/cgi-bin/carddisp.pl?gene=HLA-DQB1 |
| VCAM1 | Protein Coding | P19320 | 53 | GC01P100719 | 1.194204211 | https://www.genecards.org/cgi-bin/carddisp.pl?gene=VCAM1 |
| HP | Protein Coding | P00738 | 52 | GC16P073300 | 1.18185091 | https://www.genecards.org/cgi-bin/carddisp.pl?gene=HP |
| BAX | Protein Coding | Q07812 | 57 | GC19P048954 | 1.181110024 | https://www.genecards.org/cgi-bin/carddisp.pl?gene=BAX |
| HLA-A | Protein Coding | P04439 | 53 | GC06P104057 | 1.181110024 | https://www.genecards.org/cgi-bin/carddisp.pl?gene=HLA-A |
| IL22 | Protein Coding | Q9GZX6 | 48 | GC12M068248 | 1.181110024 | https://www.genecards.org/cgi-bin/carddisp.pl?gene=IL22 |
| IGHE | Protein Coding | P01854 | 36 | GC14M115495 | 1.181110024 | https://www.genecards.org/cgi-bin/carddisp.pl?gene=IGHE |
| PRDM1 | Protein Coding | O75626 | 52 | GC06P107226 | 1.156099916 | https://www.genecards.org/cgi-bin/carddisp.pl?gene=PRDM1 |
| HLA-DQA1 | Protein Coding | P01909 | 49 | GC06P104128 | 1.156099916 | https://www.genecards.org/cgi-bin/carddisp.pl?gene=HLA-DQA1 |
| IL18R1 | Protein Coding | Q13478 | 50 | GC02P102311 | 1.132033587 | https://www.genecards.org/cgi-bin/carddisp.pl?gene=IL18R1 |
| PCNA | Protein Coding | P12004 | 57 | GC20M005114 | 1.128435969 | https://www.genecards.org/cgi-bin/carddisp.pl?gene=PCNA |
| CYP19A1 | Protein Coding | P11511 | 56 | GC15M051208 | 1.128435969 | https://www.genecards.org/cgi-bin/carddisp.pl?gene=CYP19A1 |
| RORC | Protein Coding | P51449 | 50 | GC01M151806 | 1.128435969 | https://www.genecards.org/cgi-bin/carddisp.pl?gene=RORC |
| S100A9 | Protein Coding | P06702 | 50 | GC01P153357 | 1.128435969 | https://www.genecards.org/cgi-bin/carddisp.pl?gene=S100A9 |
| SIGLEC5 | Protein Coding | O15389 | 46 | GC19M080009 | 1.128435969 | https://www.genecards.org/cgi-bin/carddisp.pl?gene=SIGLEC5 |
| CSN2 | Protein Coding | P05814 | 41 | GC04M069955 | 1.128435969 | https://www.genecards.org/cgi-bin/carddisp.pl?gene=CSN2 |
| CDK4 | Protein Coding | P11802 | 61 | GC12M058711 | 1.122620821 | https://www.genecards.org/cgi-bin/carddisp.pl?gene=CDK4 |
| THBS1 | Protein Coding | P07996 | 52 | GC15P039581 | 1.122620821 | https://www.genecards.org/cgi-bin/carddisp.pl?gene=THBS1 |
| IRF1 | Protein Coding | P10914 | 53 | GC05M132440 | 1.115369916 | https://www.genecards.org/cgi-bin/carddisp.pl?gene=IRF1 |
| SST | Protein Coding | P61278 | 47 | GC03M187668 | 1.115369916 | https://www.genecards.org/cgi-bin/carddisp.pl?gene=SST |
| ACE | Protein Coding | P12821 | 58 | GC17P063477 | 1.112787843 | https://www.genecards.org/cgi-bin/carddisp.pl?gene=ACE |
| EIF2S1 | Protein Coding | P05198 | 50 | GC14P067359 | 1.097036004 | https://www.genecards.org/cgi-bin/carddisp.pl?gene=EIF2S1 |
| VTCN1 | Protein Coding | Q7Z7D3 | 48 | GC01M117143 | 1.097036004 | https://www.genecards.org/cgi-bin/carddisp.pl?gene=VTCN1 |
| CLEC12A | Protein Coding | Q5QGZ9 | 46 | GC12P009951 | 1.097036004 | https://www.genecards.org/cgi-bin/carddisp.pl?gene=CLEC12A |
| IL17B | Protein Coding | Q9UHF5 | 46 | GC05M149371 | 1.094999313 | https://www.genecards.org/cgi-bin/carddisp.pl?gene=IL17B |
| IFNAR2 | Protein Coding | P48551 | 56 | GC21P033229 | 1.070669413 | https://www.genecards.org/cgi-bin/carddisp.pl?gene=IFNAR2 |
| CD14 | Protein Coding | P08571 | 53 | GC05M140631 | 1.070669413 | https://www.genecards.org/cgi-bin/carddisp.pl?gene=CD14 |
| IGF1 | Protein Coding | P05019 | 55 | GC12M102395 | 1.059789777 | https://www.genecards.org/cgi-bin/carddisp.pl?gene=IGF1 |
| P2RY11 | Protein Coding | Q96G91 | 51 | GC19P011094 | 1.059789777 | https://www.genecards.org/cgi-bin/carddisp.pl?gene=P2RY11 |
| SPHK2 | Protein Coding | Q9NRA0 | 50 | GC19P048619 | 1.059789777 | https://www.genecards.org/cgi-bin/carddisp.pl?gene=SPHK2 |
| CEACAM6 | Protein Coding | P40199 | 48 | GC19P041750 | 1.059789777 | https://www.genecards.org/cgi-bin/carddisp.pl?gene=CEACAM6 |
| SERPINB1 | Protein Coding | P30740 | 47 | GC06M003433 | 1.059789777 | https://www.genecards.org/cgi-bin/carddisp.pl?gene=SERPINB1 |
| HSPA1B | Protein Coding | P0DMV9 | 46 | GC06P104116 | 1.059789777 | https://www.genecards.org/cgi-bin/carddisp.pl?gene=HSPA1B |
| MAPK14 | Protein Coding | Q16539 | 57 | GC06P104232 | 1.054719567 | https://www.genecards.org/cgi-bin/carddisp.pl?gene=MAPK14 |
| NR1H2 | Protein Coding | P55055 | 53 | GC19P050329 | 1.054719567 | https://www.genecards.org/cgi-bin/carddisp.pl?gene=NR1H2 |
| CD200R1 | Protein Coding | Q8TD46 | 45 | GC03M112921 | 1.054719567 | https://www.genecards.org/cgi-bin/carddisp.pl?gene=CD200R1 |
| TNFRSF1B | Protein Coding | P20333 | 56 | GC01P012401 | 1.045121431 | https://www.genecards.org/cgi-bin/carddisp.pl?gene=TNFRSF1B |
| NT5E | Protein Coding | P21589 | 59 | GC06P085449 | 1.020861387 | https://www.genecards.org/cgi-bin/carddisp.pl?gene=NT5E |
| APOE | Protein Coding | P02649 | 57 | GC19P083472 | 1.020861387 | https://www.genecards.org/cgi-bin/carddisp.pl?gene=APOE |
| NR3C1 | Protein Coding | P04150 | 56 | GC05M143277 | 1.020861387 | https://www.genecards.org/cgi-bin/carddisp.pl?gene=NR3C1 |
| CD28 | Protein Coding | P10747 | 54 | GC02P203706 | 1.020861387 | https://www.genecards.org/cgi-bin/carddisp.pl?gene=CD28 |
| CD79A | Protein Coding | P11912 | 54 | GC19P041877 | 1.020861387 | https://www.genecards.org/cgi-bin/carddisp.pl?gene=CD79A |
| ITGAM | Protein Coding | P11215 | 54 | GC16P047820 | 1.020861387 | https://www.genecards.org/cgi-bin/carddisp.pl?gene=ITGAM |
| SIK2 | Protein Coding | Q9H0K1 | 52 | GC11P112129 | 1.011249542 | https://www.genecards.org/cgi-bin/carddisp.pl?gene=SIK2 |
| F2RL1 | Protein Coding | P55085 | 50 | GC05P076818 | 1.011249542 | https://www.genecards.org/cgi-bin/carddisp.pl?gene=F2RL1 |
| MBL2 | Protein Coding | P11226 | 53 | GC10M052760 | 1.002774 | https://www.genecards.org/cgi-bin/carddisp.pl?gene=MBL2 |
| CCL11 | Protein Coding | P51671 | 52 | GC17P034285 | 1.002774 | https://www.genecards.org/cgi-bin/carddisp.pl?gene=CCL11 |
| GAL | Protein Coding | P22466 | 51 | GC11P073118 | 1.002774 | https://www.genecards.org/cgi-bin/carddisp.pl?gene=GAL |
| IRF3 | Protein Coding | Q14653 | 51 | GC19M049659 | 1.002774 | https://www.genecards.org/cgi-bin/carddisp.pl?gene=IRF3 |
| CD209 | Protein Coding | Q9NNX6 | 50 | GC19M007739 | 1.002774 | https://www.genecards.org/cgi-bin/carddisp.pl?gene=CD209 |
| IL12A | Protein Coding | P29459 | 50 | GC03P159988 | 1.002774 | https://www.genecards.org/cgi-bin/carddisp.pl?gene=IL12A |
| LILRB1 | Protein Coding | Q8NHL6 | 50 | GC19P083909 | 1.002774 | https://www.genecards.org/cgi-bin/carddisp.pl?gene=LILRB1 |

**Supplementary Table 2:Primer design**

| Key gene | Primer |
| --- | --- |
| SIGLEC5 F | ATGCTCCACAGAAGCTGACC |
| SIGLEC5 R | GGCATAGTGAAGTTCGGGCT |
| SERPINB1 F | AAGCAACCCCACAGGAAACA |
| SERPINB1 R | TGCAGAATGTAGCGATGCCT |
| HP F | CATGGGCTATGTGTCCGGTT |
| HP R | CTTGGTAAGGCCAGCACAGA |
| S100A9 F | CGCAGCATAAGCACCATCAT |
| S100A9 R | TCCTGGTTTGTGTCCAGGTC |
| MAPK14 F | TCGGCACACTGATGACGAAA |
| MAPK14 R | GTCCCCGTCAGACGCATTAT |

**Supplementary Table 3:GSEA results of GSE13904**

| Description | setSize | NES | p.adjust | qvalues |
| --- | --- | --- | --- | --- |
| PID_IL6_7_PATHWAY | 47 | 2.103610047 | 0.000106147 | 8.09942E-05 |
| WP_IL4_SIGNALING_PATHWAY | 54 | 2.072327133 | 0.000122161 | 9.32136E-05 |
| WP_OXIDATIVE_STRESS_RESPONSE | 33 | 2.051249373 | 0.000902599 | 0.00068872 |
| REACTOME_SIGNALING_BY_INTERLEUKINS | 441 | 2.033407575 | 2.25364E-08 | 1.71962E-08 |
| REACTOME_NEUTROPHIL_DEGRANULATION | 448 | 3.042295995 | 2.25364E-08 | 1.71962E-08 |
| REACTOME_INTERLEUKIN_4_AND_INTERLEUKIN_13_SIGNALING | 106 | 2.163629158 | 3.34997E-06 | 2.55616E-06 |
| BIOCARTA_IL1R_PATHWAY | 30 | 2.076261739 | 0.000869334 | 0.000663338 |
| WP_SIGNAL_TRANSDUCTION_THROUGH_IL1R | 32 | 2.048699925 | 0.001049356 | 0.000800702 |
| PID_IL1_PATHWAY | 32 | 2.029564392 | 0.00132038 | 0.001007504 |
| REACTOME_INFECTION_WITH_MYCOBACTERIUM_TUBERCULOSIS | 27 | 2.018925773 | 0.001795309 | 0.001369895 |
| REACTOME_INTERLEUKIN_1_FAMILY_SIGNALING | 145 | 2.011936855 | 3.20916E-05 | 2.44872E-05 |
| PID_IL4_2PATHWAY | 62 | 1.981796636 | 0.001294546 | 0.000987792 |
| WP_IL6_SIGNALING_PATHWAY | 43 | 1.979463486 | 0.002049861 | 0.001564129 |
| REACTOME_PURINERGIC_SIGNALING_IN_LEISHMANIASIS_INFECTION | 26 | 1.969559445 | 0.004762903 | 0.003634291 |
| WP_IL1_SIGNALING_PATHWAY | 53 | 1.958907656 | 0.001599111 | 0.001220188 |
| REACTOME_INTERLEUKIN_1_SIGNALING | 108 | 1.95188234 | 0.000398179 | 0.000303827 |
| WP_LDL_INFLUENCE_ON_CD14_AND_TLR4 | 24 | 1.949123501 | 0.004767776 | 0.003638009 |
| PID_IL8_CXCR1_PATHWAY | 27 | 1.918881564 | 0.006208401 | 0.004737265 |
| WP_VITAMIN_D_IN_INFLAMMATORY_DISEASES | 21 | 1.89571141 | 0.01014373 | 0.007740083 |
| KEGG_STARCH_AND_SUCROSE_METABOLISM | 35 | 1.891577356 | 0.004215254 | 0.003216412 |

GSEA：Gene Set Enrichment Analysis.

**Supplementary Table 4:GSEA results of GSE69686**

| Description | setSize | NES | p.adjust | qvalues |
| --- | --- | --- | --- | --- |
| REACTOME_NEUTROPHIL_DEGRANULATION | 402 | 2.519245202 | 1.27452E-07 | 1.12247E-07 |
| PID_IL1_PATHWAY | 27 | 1.956968147 | 0.003326595 | 0.002929738 |
| BIOCARTA_IL1R_PATHWAY | 27 | 1.955196587 | 0.003326595 | 0.002929738 |
| REACTOME_INTERLEUKIN_1_FAMILY_SIGNALING | 133 | 1.954633044 | 5.03875E-05 | 4.43764E-05 |
| WP_SIGNAL_TRANSDUCTION_THROUGH_IL1R | 29 | 1.891610088 | 0.007711379 | 0.006791425 |
| KEGG_GALACTOSE_METABOLISM | 22 | 1.878024512 | 0.015849576 | 0.01395875 |
| KEGG_STARCH_AND_SUCROSE_METABOLISM | 35 | 1.877774123 | 0.007711379 | 0.006791425 |
| WP_MITOCHONDRIAL_LONG_CHAIN_FATTY_ACID_BETAOXIDATION | 16 | 1.860529507 | 0.012086882 | 0.010644938 |
| REACTOME_INTERLEUKIN_1_SIGNALING | 104 | 1.855653141 | 0.001312577 | 0.001155989 |
| KEGG_GLYCOLYSIS_GLUCONEOGENESIS | 58 | 1.835634283 | 0.011079351 | 0.009757604 |
| WP_DISORDERS_OF_GALACTOSE_METABOLISM | 12 | 1.794866938 | 0.034209246 | 0.030128143 |
| REACTOME_INTERLEUKIN_10_SIGNALING | 43 | 1.769629667 | 0.02638833 | 0.023240248 |
| WP_RESOLVIN_E1_AND_RESOLVIN_D1_SIGNALING_PATHWAYS_PROMOTING_INFLAMMATION_RESOLUTION | 10 | 1.764555082 | 0.038354832 | 0.033779168 |
| WP_OMEGA3_OMEGA6_FATTY_ACID_SYNTHESIS | 13 | 1.756399536 | 0.039235336 | 0.034554629 |
| REACTOME_DECTIN_2_FAMILY | 21 | 1.73992226 | 0.045149548 | 0.039763286 |
| REACTOME_SIGNALING_BY_INTERLEUKINS | 417 | 1.710415402 | 1.87434E-05 | 1.65073E-05 |
| KEGG_LEISHMANIA_INFECTION | 58 | 1.710023343 | 0.048477314 | 0.042694055 |
| REACTOME_PARASITE_INFECTION | 55 | 1.699993047 | 0.043393004 | 0.038216294 |
| REACTOME_LEISHMANIA_INFECTION | 234 | 1.680377118 | 0.001187694 | 0.001046004 |
| NABA_ECM_AFFILIATED | 135 | 1.643080432 | 0.011079351 | 0.009757604 |

GSEA：Gene Set Enrichment Analysis.
